# Supplementary material
Source: publisher figshare collection journal article supplement (https://acs.figshare.com/ndownloader/files/4439053)
Supplement: Supplementary file 1 [file 4439053]

## Supplementary Information For

### Rapid, Reversible Preparation of Size-Controllable Silver Nanoplates by Chemical Redox

Jinkyu Roh, Jongheop Yi<sup>a</sup> and Younghun Kim\*

*Department of Chemical Engineering, Kwangwoon University, Seoul  
139-701, Korea.*

*<sup>a</sup>School of Chemical and Biological Engineering, Seoul National University, Seoul 151-  
742, Korea.*

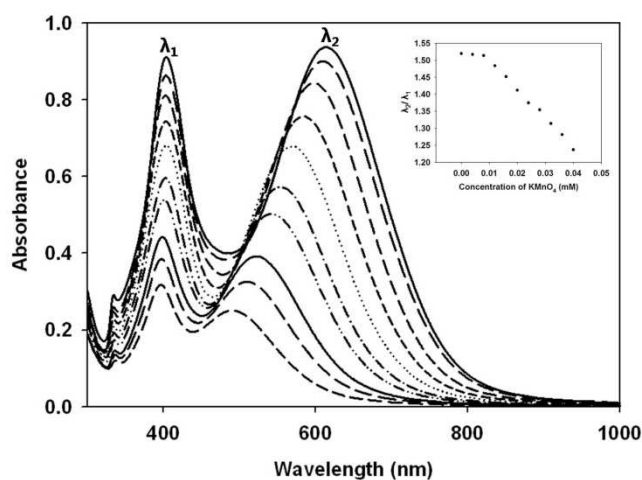

**Figure S1.** UV-vis spectra of the oxidized AgNPs by the various concentration of KMnO<sub>4</sub> (from 0.000 to 0.040 mM). Inset: the rate of the third and second peak according to the concentration of KMnO<sub>4</sub>.

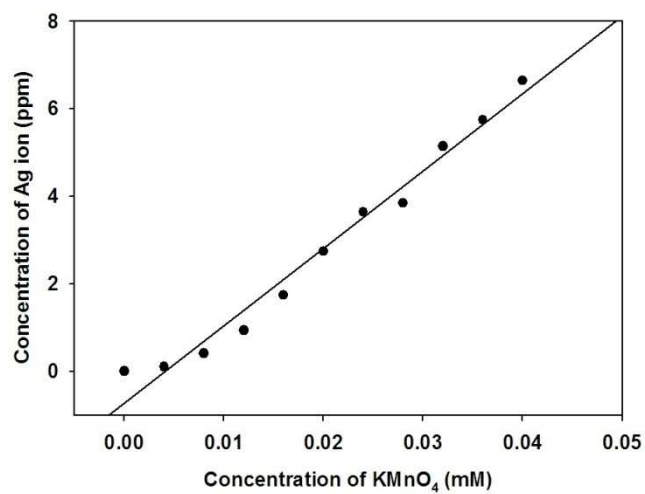

**Figure S2.** The concentration variation of  $\text{Ag}^+$  according to the concentration of  $\text{KMnO}_4$  ( $R^2 = 0.977$ ).

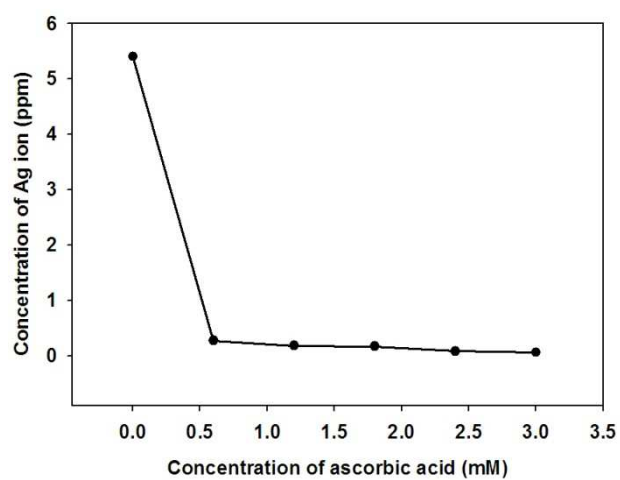

**Figure S3** The concentration variation of  $\text{Ag}^+$  according to the concentration of AA.

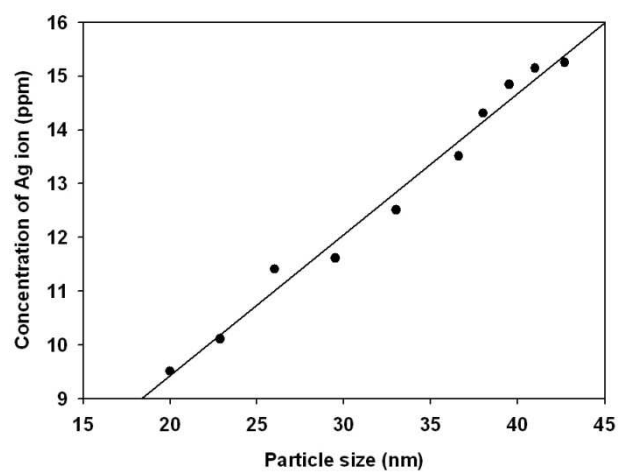

**Figure S4.** The concentration variation of  $\text{Ag}^+$  according to the particle size.
